# Supplementary material for: Antibiotic Use Among Hospitalized Children and Neonates in China: Results From Quarterly Point Prevalence Surveys in 2019
Source: PubMed Central journal article supplement (PMC8039455; doi:10.3389/fphar.2021.601561), 2021-03-29
Supplement: datasheet1.pdf [file datasheet1.pdf]

## Supplementary Material

### 1.1 Supplementary Figure

Supplementary Figure 1. Distribution of antibiotic ATC classes in different ward types

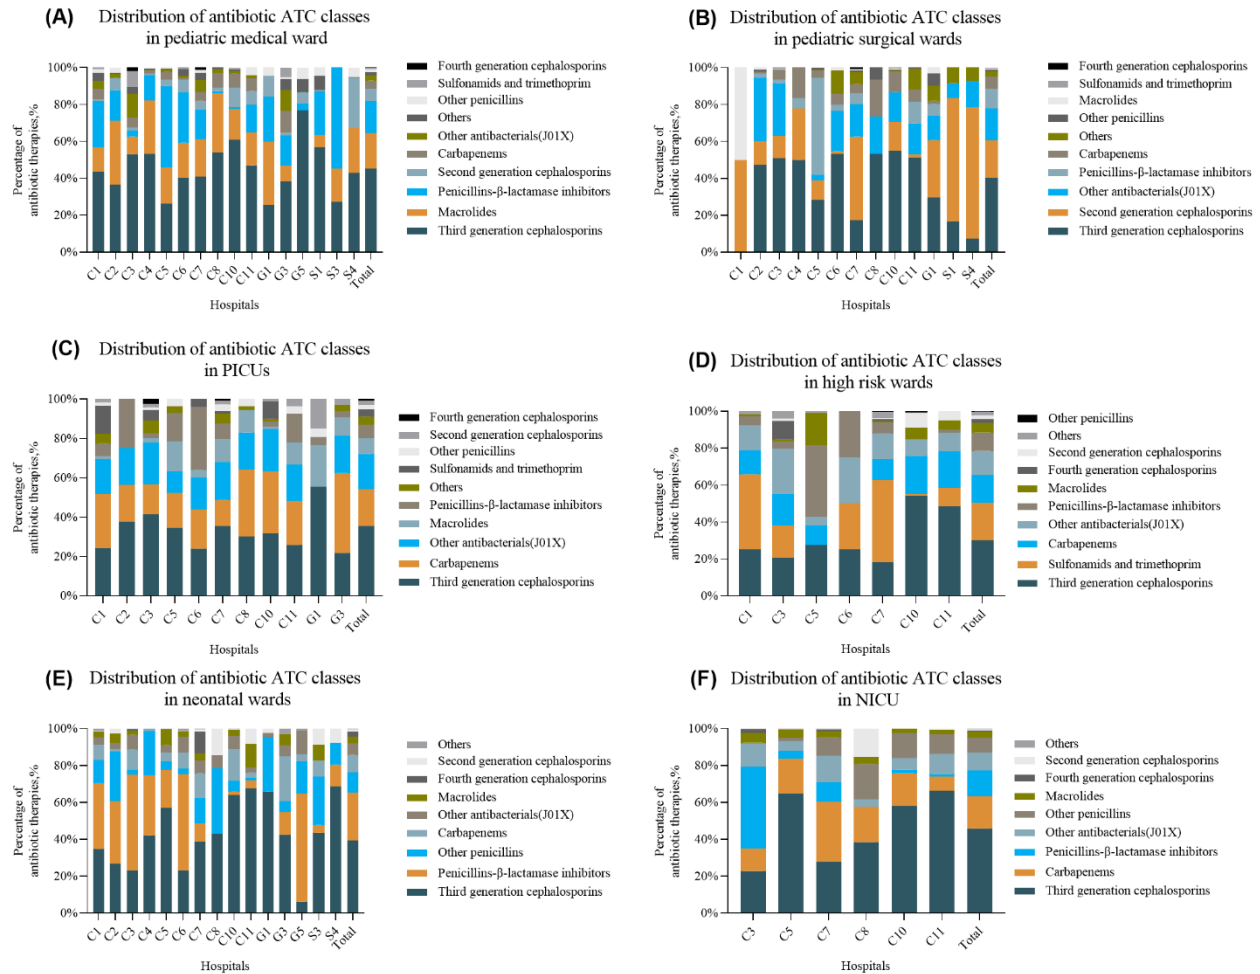

**Supplementary Figure 1.** Distribution of antibiotic ATC classes within different ward types varied by hospitals.
